# Supplementary material for: AHSA1 is a promising therapeutic target for cellular proliferation and proteasome inhibitor resistance in multiple myeloma
Source: PubMed Central journal article supplement (PMC8734095; doi:10.1186/s13046-021-02220-1), 2022-01-06

**Supplementary Figure 1**

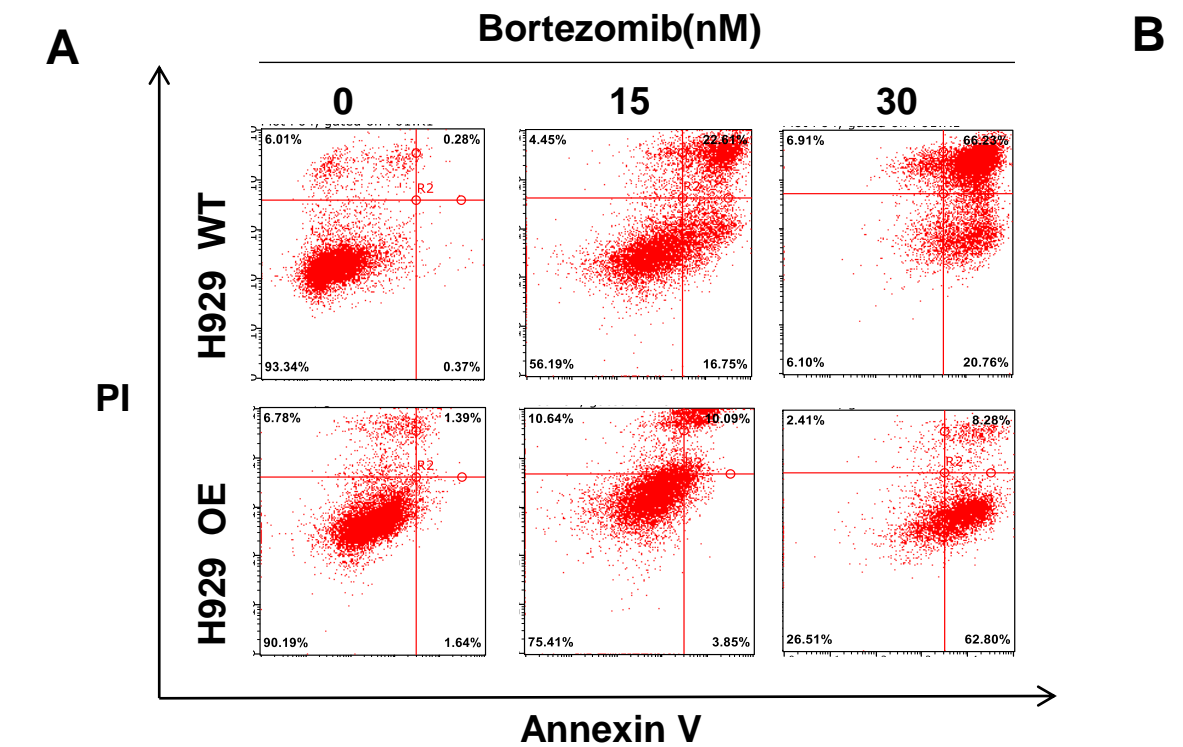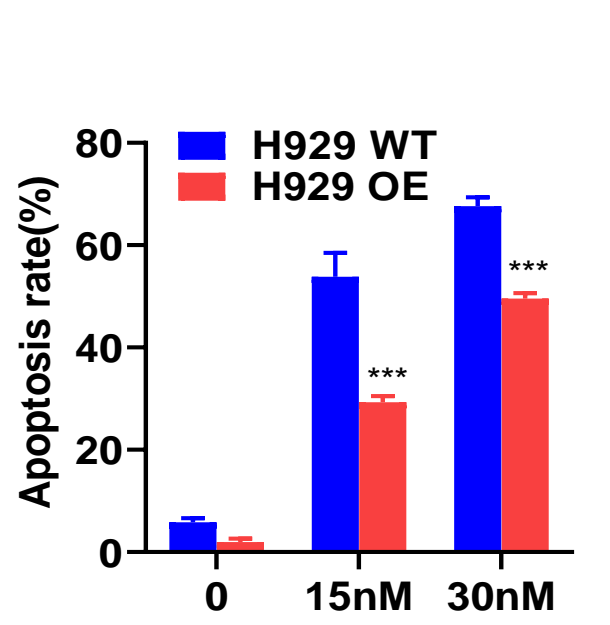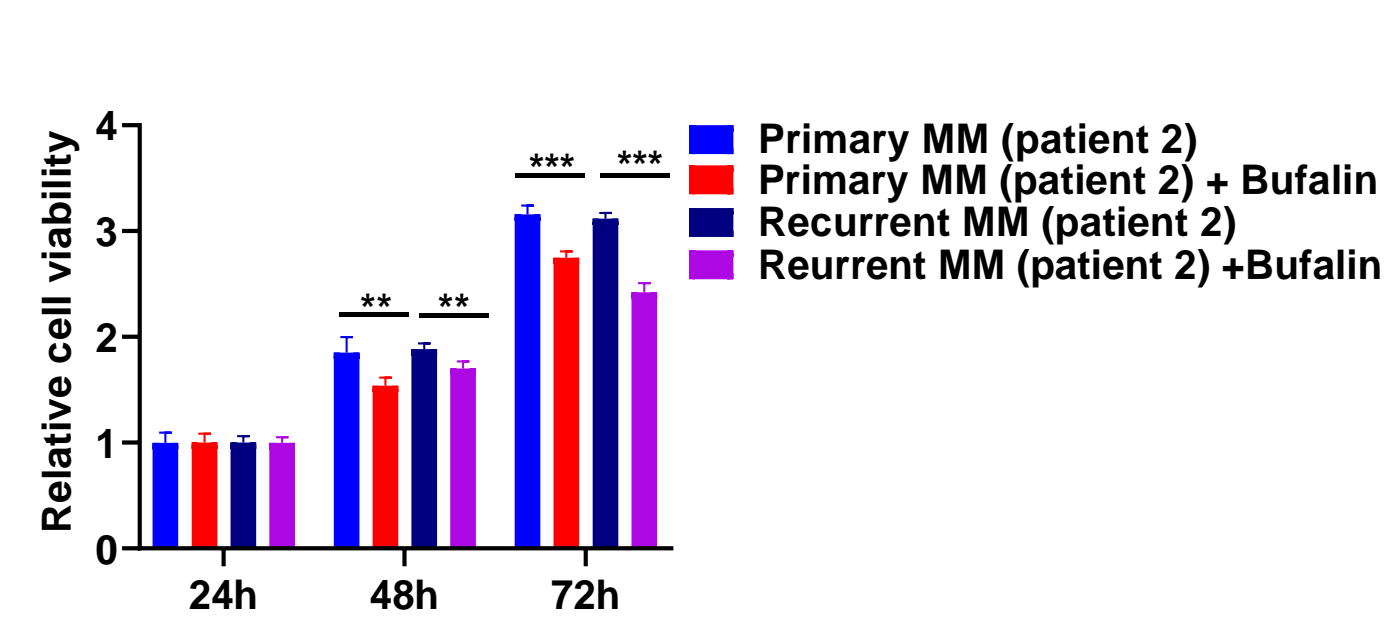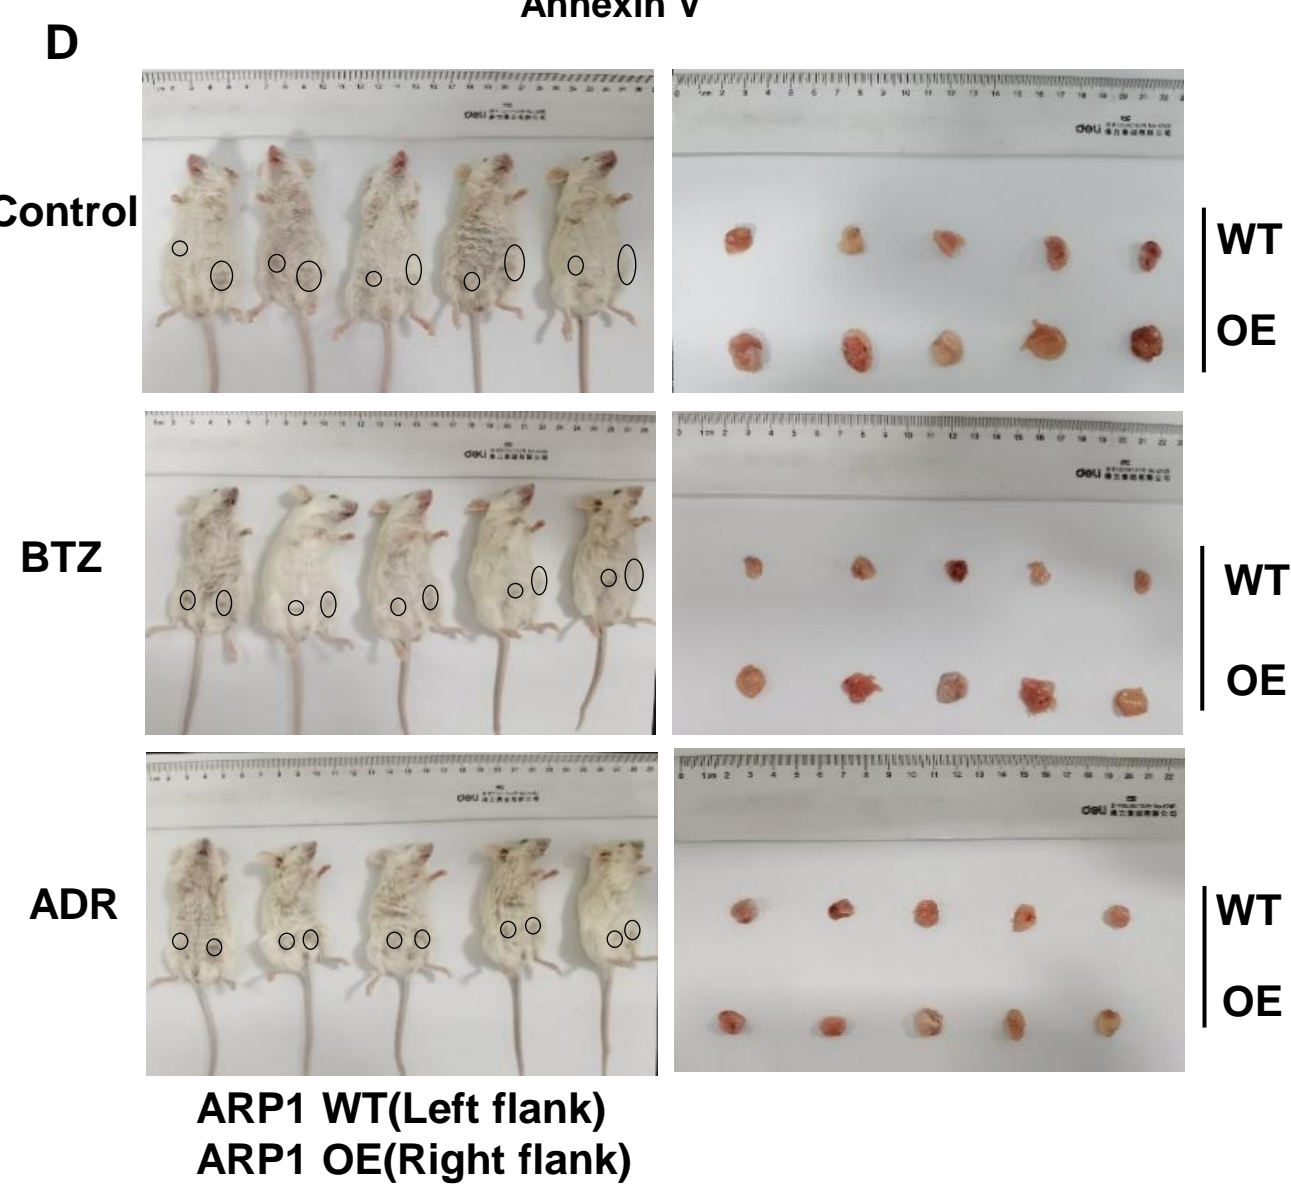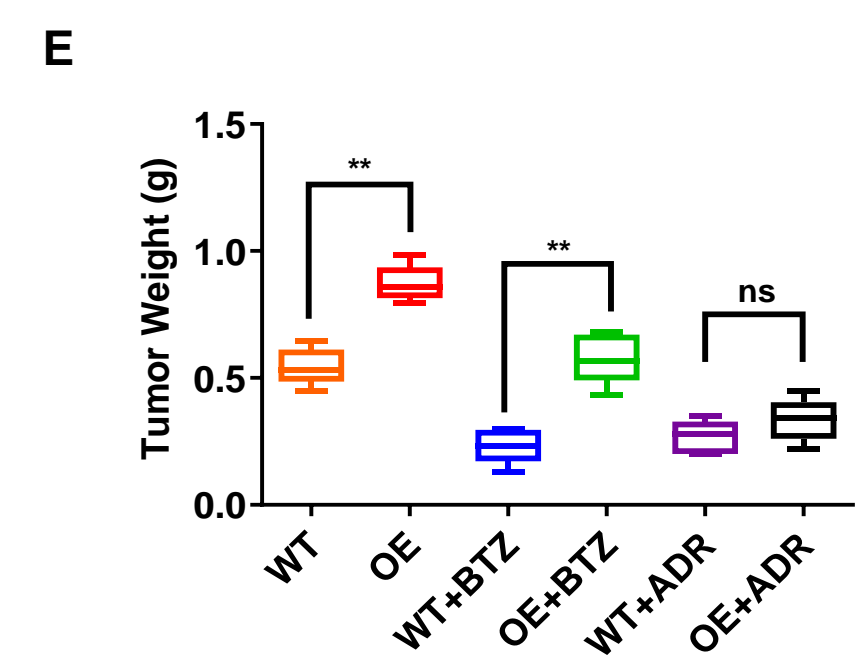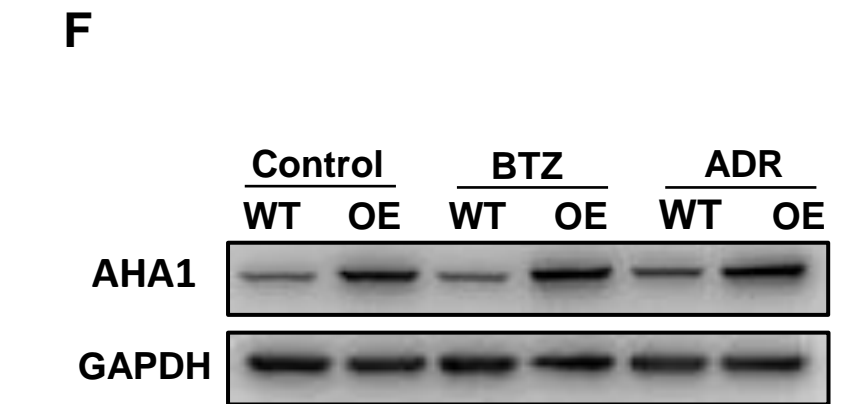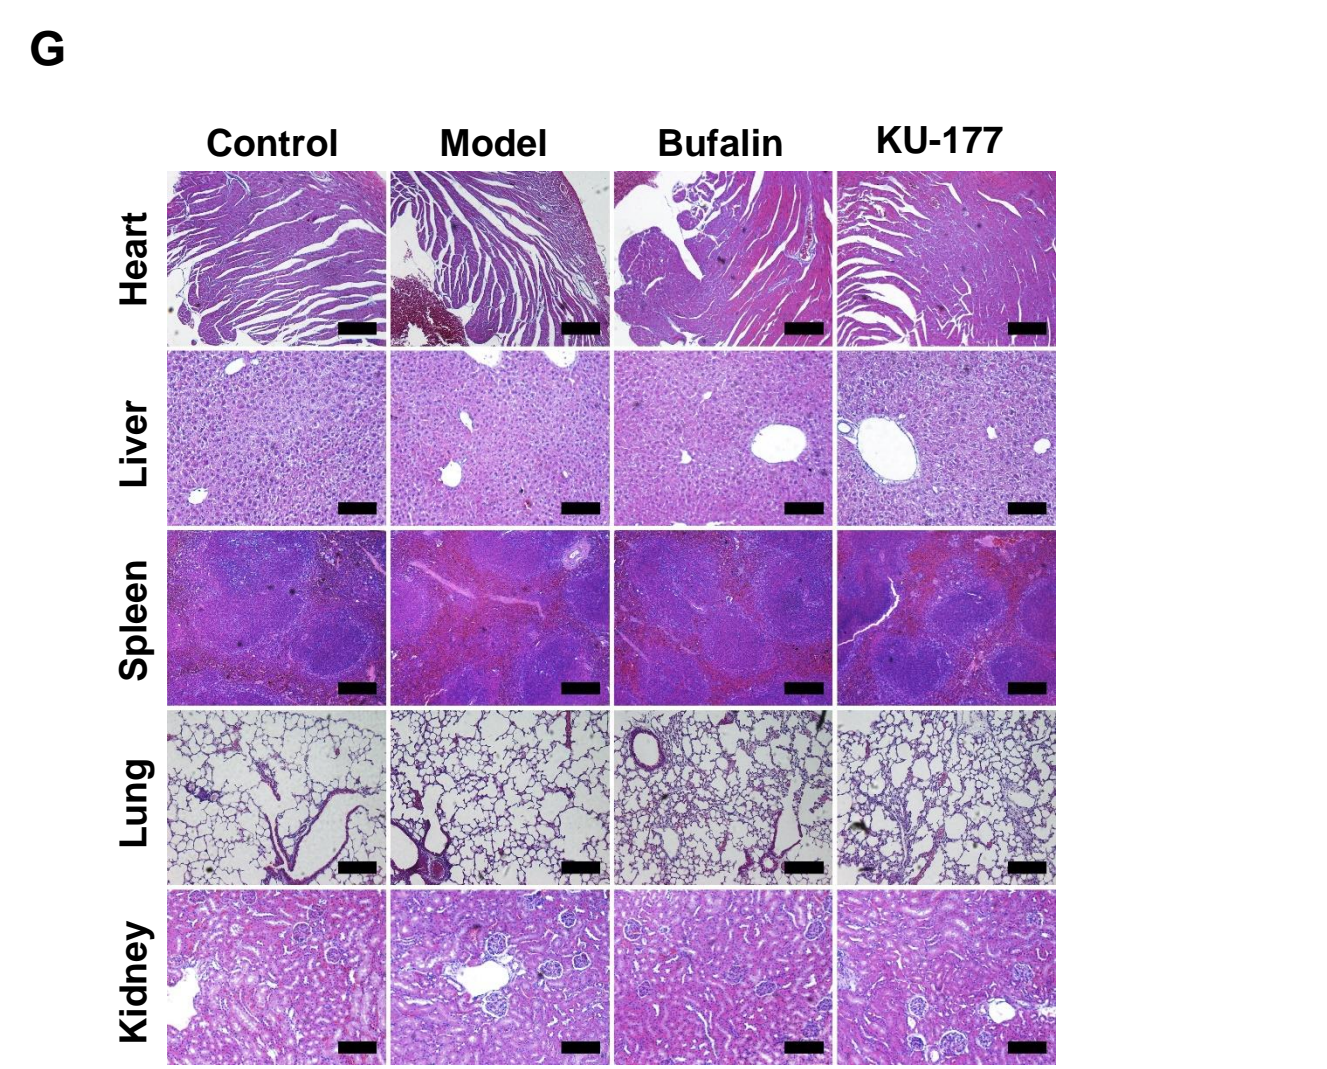

Supplement: 13046_2021_2220_MOESM1_ESM.pdf [file 13046_2021_2220_MOESM1_ESM.pdf]
